# Supplementary material for: Layered double hydroxide anchored ionic liquids as amphiphilic heterogeneous catalysts for the Knoevenagel condensation reaction
Source: Royal Society of Chemistry journal article supplement (doi:10.1039/c7dt03665e), 2017-11-15
Supplement: c7dt03665e1.pdf [file c7dt03665e1.pdf]

## Supporting Information

### Layered double hydroxides anchored ionic liquids as amphiphilic heterogeneous catalyst for Knoevenagel condensation

Tengfei Li,<sup>a</sup> Wei Zhang,<sup>a</sup> Wei Chen,<sup>a</sup> Haralampos N. Miras<sup>b\*</sup> and Yu-Fei Song<sup>ac\*</sup>

<sup>a</sup>State Key Laboratory of Chemical Resource Engineering, Beijing University of Chemical Technology, 100029 Beijing, P. R. China.

<sup>b</sup>WestCHEM, School of Chemistry, University of Glasgow, Glasgow, G12 8QQ, UK.

<sup>c</sup>Beijing Advanced Innovation Center for Soft Matter Science and Engineering, Beijing University of Chemical Technology, Beijing, P. R. China.

#### **List of Contents:**

Scaled-up synthesis of LDH-ILs-C12

Instruments

**Table S1.** ICP-AES measurements of the composition of different samples (mmol/g).

**Figure. S1.** TG-DTA profile of LDHs-ILs-C4

**Figure. S2.** TG-DTA profile of LDHs-ILs-C8.

**Figure. S3.** TG-DTA profile LDH-CO<sub>3</sub>.

**Table S2.** Comparison of physicochemical properties LDH-ILs-Cn (n=4, 8, 12).

**Figure. S4.** SEM images of a) LDH-CO<sub>3</sub>, b) LDH-ILs-C4, c) LDH-ILs-C8, d) LDH-ILs-C12.

**Figure. S5.** The CO<sub>2</sub>-TPD curves of a) LDH-ILs-C4, b) LDH-ILs-C8, c) LDH-ILs-C12 and d) LDHs-CO<sub>3</sub> with carbonate as the intercalated anions in the interlayer.

**Figure. S6.** <sup>1</sup>H NMR and <sup>13</sup>C NMR spectra of the product of Knoevenagel condensation of benzaldehyde with ethyl cyanoacetate.

**Figure. S7.** Kinetic profiles of the Knoevenagel condensation of benzaldehyde with ethyl cyanoacetate catalyzed by LDH-ILs-C4 (red line: yield of corresponding products; red line: ln(C<sub>t</sub>/C<sub>0</sub>), data were obtained by carrying out parallel experiments under the same experimental conditions).

**Figure S8.** Kinetic profiles of the Knoevenagel condensation of benzaldehyde with ethyl cyanoacetate catalyzed by LDH-ILs-C8 (red line: yield of corresponding products; red line: ln(C<sub>t</sub>/C<sub>0</sub>), data were obtained by carrying out parallel experiments under the same experimental conditions).

**Table S3.** The Knoevenagel condensation of benzaldehyde with ethyl cyanoacetate catalyzed by LDH-CO<sub>3</sub> at room temperature in aqueous solution.

### *Scaled-up synthesis of LDH-ILs-C12*

In a typical experiment, LDH-NO<sub>3</sub> (1.5 g) was added to formamide (500 mL) in a three necked flask, which was purged with N<sub>2</sub> to avoid carbonate contamination for 3h. Then the reaction mixture was under 60 kHz ultrasonication for 2 h. After that, the mixture was continuously vigorously stirred for 3 days under N<sub>2</sub> atmosphere. 13 mmol ILs-C12 was dissolved in CH<sub>3</sub>CN (25 mL) and added dropwise to the nanosheets suspension. The reaction mixture was stirred under N<sub>2</sub> for 24 h. 5 g Na<sub>2</sub>CO<sub>3</sub> was dissolved in 10 mL H<sub>2</sub>O and added dropwise to the reaction mixture. After stirring for 1 h, the resultant precipitate of LDH-ILs-C12 was collected by centrifugation and washed with ethanol and water, and dried under vacuum overnight.

### **Instruments**

Fourier transform infrared (FT-IR) spectra were recorded on a Bruker Vector 22 infrared spectrometer by using KBr pellet method. The <sup>1</sup>H-NMR and <sup>13</sup>C-NMR spectra were recorded on a Bruker AV400 NMR spectrometer at resonance frequency of 400 MHz, and the chemical shifts were given relative to TMS as the internal reference. The solid-state <sup>29</sup>Si CP/MAS NMR experiment were recorded at 79.49 MHz with 60s pulse delay. The <sup>13</sup>C CP/MAS NMR were obtained at 100.62 MHz with 5s pulse delay. The <sup>27</sup>Al MAS NMR was carried out at 104.23 MHz with a 2s pulse delays. All the spectra were performed by using a Bruker Ascend Aeon 400 WB solid-state spectrometer equipped with a commercial 4 mm MAS NMR probe for <sup>29</sup>Si and <sup>13</sup>C, and a commercial 2.5 mm MAS NMR probe for <sup>27</sup>Al. The powder X-ray diffraction (XRD) analysis was carried out on a Bruker D8 diffractometer with high-intensity Cu-K $\alpha$  radiation ( $\lambda$  = 0.154 nm). Thermogravimetric (TG) analysis was performed on a STA-449C Jupiter (HCT-2 Corporation) at a heating rate of 10 °C min<sup>-1</sup> from 30 to 800 °C under N<sub>2</sub> (20 mL/min). Inductively coupled plasma-atomic emission spectroscopy (ICP-AES) analysis was performed on a Shimadzu ICPS-7500. BET measurements were performed at 77 K on a Quantachrome Autosorb-1C analyzer. N<sub>2</sub> adsorption-desorption isotherms were measured using a Quantachrome Autosorb-1 system at liquid nitrogen temperature. X-ray photoelectron spectroscopy (XPS) measurements were performed using a monochromatized Al<sub>K $\alpha$</sub>  exciting X-radiation (PHI

Quanterra SXM). Contact angles were measured with a contact angle meter at 25 °C. Scanning electron microscopy (SEM) images were obtained using a Zeiss Supra 55 SEM. The basicity of the composites were probed by the temperature-programmed desorption of carbon dioxide (CO<sub>2</sub> TPD) using a PCA-1200 Chemical adsorption apparatus.

We use CaCO<sub>3</sub> as an internal standard substance for quantitative calculation of the basic sites of hydrotalcite samples. The samples (70 mg) and CaCO<sub>3</sub> (20 mg) were degassed by heating at 100°C for 1 h under a He stream 30 mL min<sup>-1</sup> and then treated with CO<sub>2</sub> stream (30 mL min<sup>-1</sup>) at 100°C for 25 min. Physically adsorbed CO<sub>2</sub> was removed by a flushing He stream at 100°C for 10 min. Chemisorbed CO<sub>2</sub> was desorbed by heating from about 30°C up to 900°C at a rate of 10 °C min<sup>-1</sup>. The corresponding products were analysed by using an Agilent 7820A gas chromatography (GC) system using a 30 m 5% phenylmethyl silicone capillary column with an ID of 0.32 mm and 0.25 mm coating (HP-5). Yields were determined by GC analysis using reference standards. Assignments of the corresponding products were analysed by <sup>1</sup>H NMR and <sup>13</sup>C NMR spectroscopy.

**Table S1.** ICP-AES measurements of the composition of different samples.

| Materials           | Mg <sup>a</sup> | Al <sup>a</sup> | N <sup>a</sup> | Formula                                                                                                                                                                                                                        |
|---------------------|-----------------|-----------------|----------------|--------------------------------------------------------------------------------------------------------------------------------------------------------------------------------------------------------------------------------|
| LDH-CO <sub>3</sub> | 18.18           | 6.05            | -              | Mg <sub>0.75</sub> Al <sub>0.25</sub> (OH) <sub>2</sub> (CO <sub>3</sub> ) <sub>0.125</sub> ·0.5H <sub>2</sub> O                                                                                                               |
| LDH-ILs-C4          | 8.31            | 2.77            | 0.80           | Mg <sub>0.75</sub> Al <sub>0.25</sub> [O <sub>3</sub> SiC <sub>10</sub> H <sub>20</sub> N <sub>2</sub> ] <sub>0.036</sub> [Br] <sub>0.036</sub> (OH) <sub>1.92</sub> [CO <sub>3</sub> ] <sub>0.175</sub> ·0.59H <sub>2</sub> O |
| LDH-ILs-C8          | 8.08            | 2.70            | 0.75           | Mg <sub>0.75</sub> Al <sub>0.25</sub> [O <sub>3</sub> SiC <sub>14</sub> H <sub>28</sub> N <sub>2</sub> ] <sub>0.035</sub> [Br] <sub>0.035</sub> (OH) <sub>1.92</sub> [CO <sub>3</sub> ] <sub>0.175</sub> ·0.64H <sub>2</sub> O |
| LDH-ILs-C12         | 7.62            | 2.52            | 0.74           | Mg <sub>0.75</sub> Al <sub>0.25</sub> [O <sub>3</sub> SiC <sub>18</sub> H <sub>36</sub> N <sub>2</sub> ] <sub>0.036</sub> [Br] <sub>0.036</sub> (OH) <sub>1.92</sub> [CO <sub>3</sub> ] <sub>0.175</sub> ·0.83H <sub>2</sub> O |
| Reused LDH-ILs-C12  | 7.59            | 2.51            | 0.74           | Mg <sub>0.75</sub> Al <sub>0.25</sub> [O <sub>3</sub> SiC <sub>18</sub> H <sub>36</sub> N <sub>2</sub> ] <sub>0.036</sub> [Br] <sub>0.036</sub> (OH) <sub>1.92</sub> [CO <sub>3</sub> ] <sub>0.175</sub> ·0.85H <sub>2</sub> O |

<sup>a</sup>Analyzed by TCP-AES or elemental analysis; The formula was determined by TG-DTA, ICP-AES and elemental analysis.

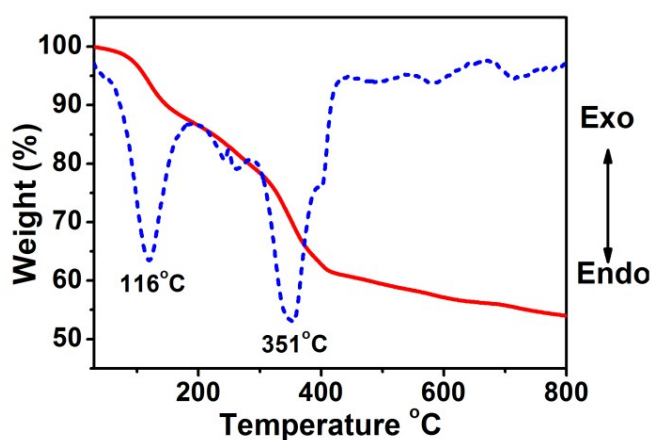

**Figure. S1** TG-DTA profile of LDHs-ILs-C4.

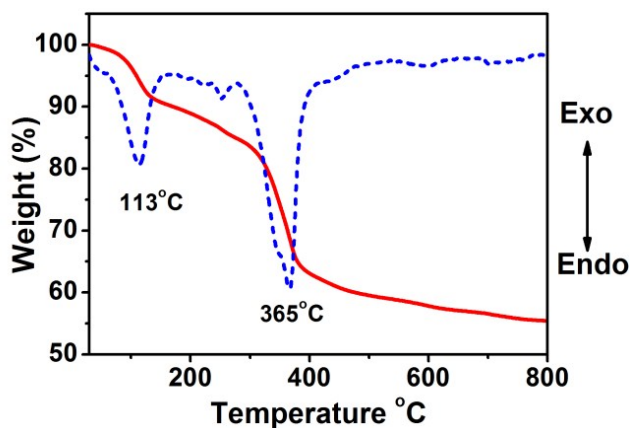

**Figure. S2** TG-DTA profile of LDHs-ILs-C8.

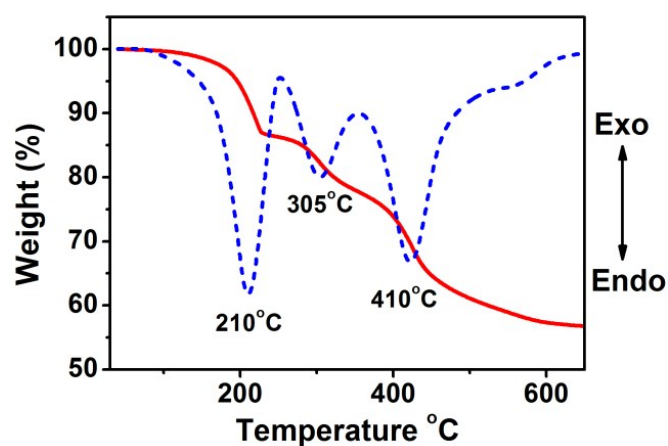

**Figure. S3** TG-DTA profile LDH-CO<sub>3</sub>.

**Table S2.** Comparison of physicochemical properties LDH-ILs-Cn (n=4, 8, 12).

| Materials   | Surface area <sup>a</sup> (m <sup>2</sup> ·g <sup>-1</sup> ) | Pore volume <sup>b</sup> (cm <sup>3</sup> ·g <sup>-1</sup> ) | Average pore size <sup>c</sup> (nm) |
|-------------|--------------------------------------------------------------|--------------------------------------------------------------|-------------------------------------|
| LDH-ILs-C4  | 25                                                           | 0.05                                                         | 3.5                                 |
| LDH-ILs-C8  | 25                                                           | 0.05                                                         | 4.2                                 |
| LDH-ILs-C12 | 28                                                           | 0.06                                                         | 4.8                                 |

<sup>a</sup> specific surface area calculated by the BET method in the relative adsorption pressure ( $P/P_0$ ); <sup>b</sup> total pore volume determined by N<sub>2</sub> desorption at relative pressure; <sup>c</sup> average pore diameter obtained from the desorption isotherm by the BJH method.

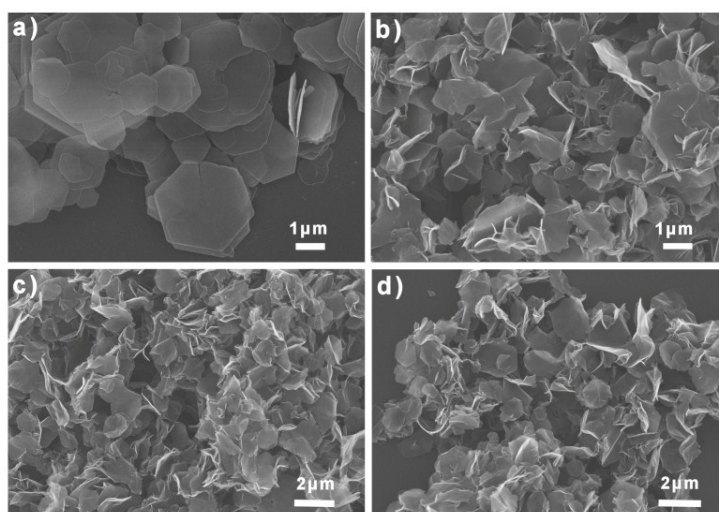

**Figure. S4** SEM images of a) LDH-CO<sub>3</sub>, b) LDH-ILs-C4, c) LDH-ILs-C8, d) LDH-ILs-C12.

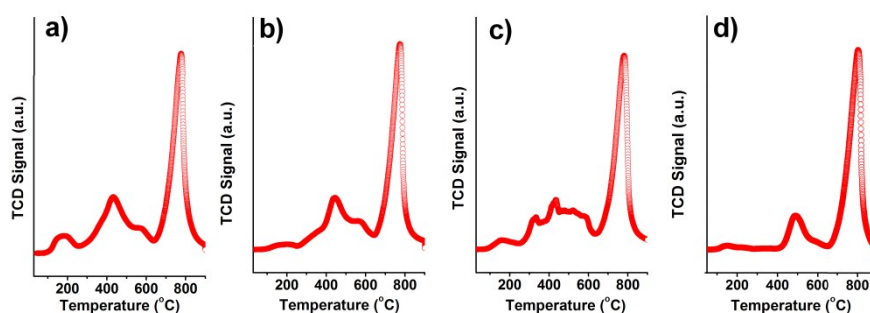

**Figure. S5.** The CO<sub>2</sub>-TPD curves of a) LDH-ILs-C4, b) LDH-ILs-C8, c) LDH-ILs-C12 and d) LDHs-CO<sub>3</sub> with carbonate as the intercalated anions in the interlayer.

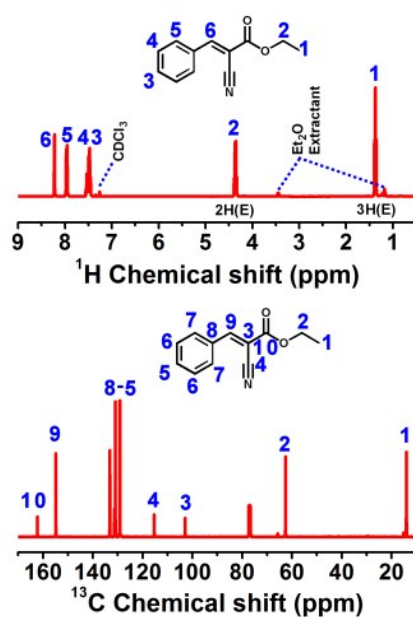

**Figure. S6** The <sup>1</sup>H NMR and <sup>13</sup>C NMR spectra of the product of Knoevenagel condensation of benzaldehyde with ethyl cyanoacetate.

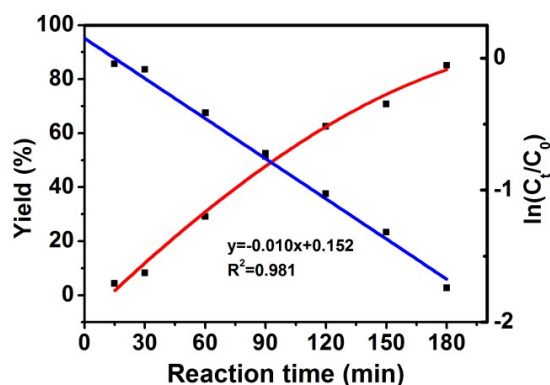

**Figure. S7** Kinetic profile of the Knoevenagel condensation of benzaldehyde with ethyl cyanoacetate catalyzed by LDH-ILs-C4 (red line: yield of corresponding products; blue line:  $\ln(C_t/C_0)$ , data were obtained by carrying out parallel experiments under the same experimental conditions).

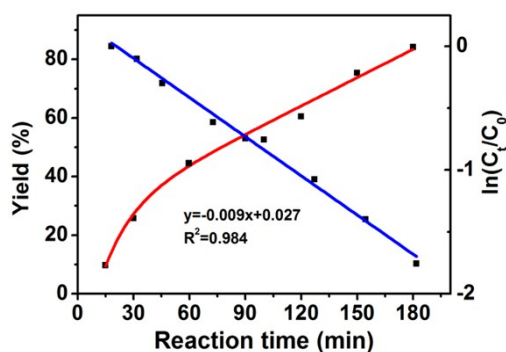

**Figure. S8** Kinetic profile of the Knoevenagel condensation of benzaldehyde with ethyl cyanoacetate catalyzed by LDH-ILs-C8 (red line: yield of corresponding products; blue line:  $\ln(C_t/C_0)$ , data were obtained by carrying out parallel experiments under the same experimental conditions).

**Table S3.** The Knoevenagel condensation of benzaldehyde with ethyl cyanoacetate catalyzed by LDH-CO<sub>3</sub> at room temperature in aqueous solution.<sup>[a]</sup>

| Entry | Donor | Acceptor                          | Product                           | Time (h) | Yield <sup>[b]</sup> (%) |
|-------|-------|-----------------------------------|-----------------------------------|----------|--------------------------|
|       |       |                                   |                                   |          |                          |
| 1     |       | X=H                               | X=H                               | 3        | 19.0                     |
| 2     |       | X=2-Me                            | X=2-Me                            | 2        | 33.9                     |
| 3     |       | X=3-Me                            | X=3-Me                            | 2        | 13.9                     |
| 4     |       | X=4-Me                            | X=4-Me                            | 2        | 8.4                      |
| 5     |       | X=2-MeO                           | X=2-MeO                           | 2        | 32.5                     |
| 6     |       | X=3-MeO                           | X=3-MeO                           | 2        | 30.4                     |
| 7     |       | X=4-MeO                           | X=4-MeO                           | 2        | 8.6                      |
| 8     |       | X=2-Cl                            | X=2-Cl                            | 2        | 16.6                     |
| 9     |       | X=3-Cl                            | X=3-Cl                            | 2        | 19.4                     |
| 10    |       | X=2-Br                            | X=2-Br                            | 2        | 17.2                     |
| 11    |       | X=3-Br                            | X=3-Br                            | 2        | 21.1                     |
| 12    |       | X=4-Br                            | X=4-Br                            | 2        | 37.4                     |
| 13    |       | X=2-NO <sub>2</sub>               | X=2-NO <sub>2</sub>               | 2        | 57.3                     |
| 14    |       | X=3-NO <sub>2</sub>               | X=3-NO <sub>2</sub>               | 2        | 57.7                     |
| 15    |       | X=4-NO <sub>2</sub>               | X=4-NO <sub>2</sub>               | 2        | 63.0                     |
| 16    |       |                                   |                                   | 2        | 21.0                     |
| 17    |       |                                   |                                   | 2        | 17.1                     |
|       |       |                                   |                                   |          |                          |
| 18    |       | R=C <sub>7</sub> H <sub>15</sub>  | R=C <sub>7</sub> H <sub>15</sub>  | 2        | 18.6                     |
| 19    |       | R=C <sub>9</sub> H <sub>19</sub>  | R=C <sub>9</sub> H <sub>19</sub>  | 2        | 6.1                      |
| 20    |       | R=C <sub>10</sub> H <sub>21</sub> | R=C <sub>10</sub> H <sub>21</sub> | 2        | 7.6                      |

<sup>[a]</sup>Reaction conditions: 1 mmol Substrate, 1.5 mmol ethyl cyanoacetate, 30 mg catalyst LDH-CO<sub>3</sub>, 0.5 mL H<sub>2</sub>O, rt.

<sup>[b]</sup>Yields were determined by GC analysis using reference standards. Assignments of corresponding products were analyzed by <sup>1</sup>H NMR and <sup>13</sup>C NMR spectroscopy.

## <sup>1</sup>H and <sup>13</sup>C data of resulting products

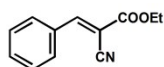

<sup>1</sup>H-NMR (400 MHz, CDCl<sub>3</sub>, 298 K, TMS): δ= 8.23 (s, 1H), 7.91 (d, 2H), 7.45-7.56 (d, 3H), 4.37 (m, 2H), 1.37 (t, 3H); <sup>13</sup>C-NMR (400 MHz, CDCl<sub>3</sub>, 298 K, TMS): δ= 162.3, 154.9, 133.2, 131.3, 130.9, 129.1, 115.4, 102.9, 62.6, 14.2.

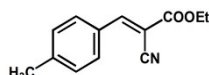

<sup>1</sup>H-NMR (400 MHz, CDCl<sub>3</sub>, 298 K, TMS): δ= 8.19 (s, 1H), 7.59 (d, 2H), 7.40 (d, 2H), 4.33 (m, 2H), 2.40 (m, 3H), 1.31 (t, 3H); <sup>13</sup>C-NMR (400 MHz, CDCl<sub>3</sub>, 298 K, TMS): δ= 162.1, 154.6, 137.6, 130.1, 128.9, 128.5, 129.1, 102.7, 60.9, 21.3, 14.2.

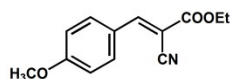

<sup>1</sup>H-NMR (400 MHz, CDCl<sub>3</sub>, 298 K, TMS): δ= 8.23 (s, 1H), 8.00 (d, 2H), 7.16 (d, 2H), 4.33 (m, 2H), 3.81 (m, 3H), 1.27 (t, 3H); <sup>13</sup>C-NMR (400 MHz, CDCl<sub>3</sub>, 298 K, TMS): δ= 162.1, 159.8, 154.6, 130.2, 124.4, 117.5, 115.4, 102.9, 60.9, 55.8, 14.2.

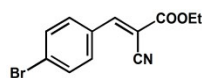

<sup>1</sup>H-NMR (400 MHz, CDCl<sub>3</sub>, 298 K, TMS): δ= 8.20 (s, 1H), 7.78 (d, 2H), 7.60 (d, 2H), 4.33 (m, 2H), 1.31 (t, 3H); <sup>13</sup>C-NMR (400 MHz, CDCl<sub>3</sub>, 298 K, TMS): δ= 162.2, 154.6, 133.3, 131.5, 131.0, 122.9, 102.9, 60.9, 14.2.

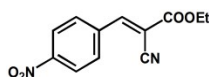

<sup>1</sup>H-NMR (400 MHz, CDCl<sub>3</sub>, 298 K, TMS): δ= 8.37 (d, 2H), 8.30 (m, 1H), 8.03 (d, 2H), 4.33 (m, 2H), 1.27 (t, 3H); <sup>13</sup>C-NMR (400 MHz, CDCl<sub>3</sub>, 298 K, TMS): δ= 162.1, 154.6, 147.1, 138.2, 131.5, 123.8, 102.7, 60.9, 14.2.

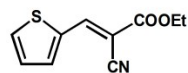

<sup>1</sup>H-NMR (400 MHz, CDCl<sub>3</sub>, 298 K, TMS): δ= 8.61 (s, 1H), 8.09 (d, 1H), 7.74 (d, 1H), 7.33 (t, 2H), 4.30 (m, 3H), 1.27 (t, 3H); <sup>13</sup>C-NMR (400 MHz, CDCl<sub>3</sub>, 298 K, TMS): δ= 162.1, 157.0, 137.8, 130.5, 129.1, 128.3, 117.5, 93.5, 60.5, 14.2.

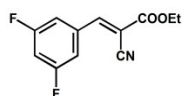

<sup>1</sup>H-NMR (400 MHz, CDCl<sub>3</sub>, 298 K, TMS): δ= 8.18 (s, 1H), 6.73 (s, 2H), 6.56 (s, 1H), 4.33 (m, 2H), 1.29 (t, 3H); <sup>13</sup>C-NMR (400 MHz, CDCl<sub>3</sub>, 298 K, TMS): δ= 162.1, 160.5, 137.6, 154.5, 138.4, 109.5, 103.9, 102.7, 60.5, 14.2.



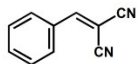

<sup>1</sup>H-NMR (400 MHz, CDCl<sub>3</sub>, 298 K, TMS): δ= 7.79 (s, 1H), 7.58(d, 2H), 7.39(d, 2H), 7.33 (d, 1H); <sup>13</sup>C-NMR (400 MHz, CDCl<sub>3</sub>, 298 K, TMS): δ= 161.5, 131.2, 128.6, 128.4, 127.9, 113.6, 81.4.

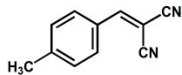

<sup>1</sup>H-NMR (400 MHz, CDCl<sub>3</sub>, 298 K, TMS): δ= 7.83 (s, 1H), 7.60 (d, 2H), 7.39(d, 2H), 2.41 (m, 3H); <sup>13</sup>C-NMR (400 MHz, CDCl<sub>3</sub>, 298 K, TMS): δ= 161.5, 137.5, 128.9, 128.4, 128.2, 113.6, 81.2, 21.3.

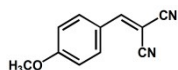

<sup>1</sup>H-NMR (400 MHz, CDCl<sub>3</sub>, 298 K, TMS): δ= 7.79 (s, 1H), 7.62(d, 2H), 7.09(d, 2H), 3.80 (m, 3H); <sup>13</sup>C-NMR (400 MHz, CDCl<sub>3</sub>, 298 K, TMS): δ= 161.5, 159.5, 130.1, 123.7, 114.5, 113.6, 81.4, 55.8.

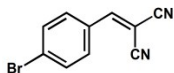

<sup>1</sup>H-NMR (400 MHz, CDCl<sub>3</sub>, 298 K, TMS): δ= 7.79 (s, 1H), 7.61(d, 2H), 7.76(d, 2H); <sup>13</sup>C-NMR (400 MHz, CDCl<sub>3</sub>, 298 K, TMS): δ= 161.5, 131.5, 130.4, 128.5, 122.3, 113.6, 81.4.

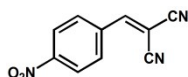

<sup>1</sup>H-NMR (400 MHz, CDCl<sub>3</sub>, 298 K, TMS): δ= 8.37 (d, 2H), 8.00(d, 2H), 7.93(s, 1H); <sup>13</sup>C-NMR (400 MHz, CDCl<sub>3</sub>, 298 K, TMS): δ= 161.5, 147.2, 137.5, 129.0, 123.3, 113.6, 81.4.

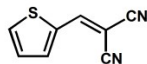

<sup>1</sup>H-NMR (400 MHz, CDCl<sub>3</sub>, 298 K, TMS): δ= 7.93 (s, 1H), 7.05(d, 1H), 7.67 (d, 1H), 6.98(d, 1H); <sup>13</sup>C-NMR (400 MHz, CDCl<sub>3</sub>, 298 K, TMS): δ= 152.3, 140.2, 135.4, 130.4, 128.3, 113.6, 75.2.

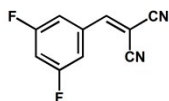

<sup>1</sup>H-NMR (400 MHz, CDCl<sub>3</sub>, 298 K, TMS): δ= 7.79 (s, 1H), 6.73(s, 2H), 6.56(s, 1H); <sup>13</sup>C-NMR (400 MHz, CDCl<sub>3</sub>, 298 K, TMS): δ= 161.5, 159.8, 138.4, 113.6, 110.0, 103.9, 81.3.
